# Supplementary figures and images for: Continuous wave laser fabrication of small pitch/size perovskite pixels realizes high-resolution color conversion micro-LED displays
Source: Royal Society of Chemistry journal article supplement (doi:10.1039/d4nr02424a), 2024-01-01

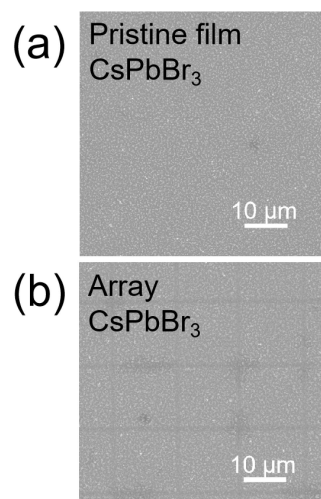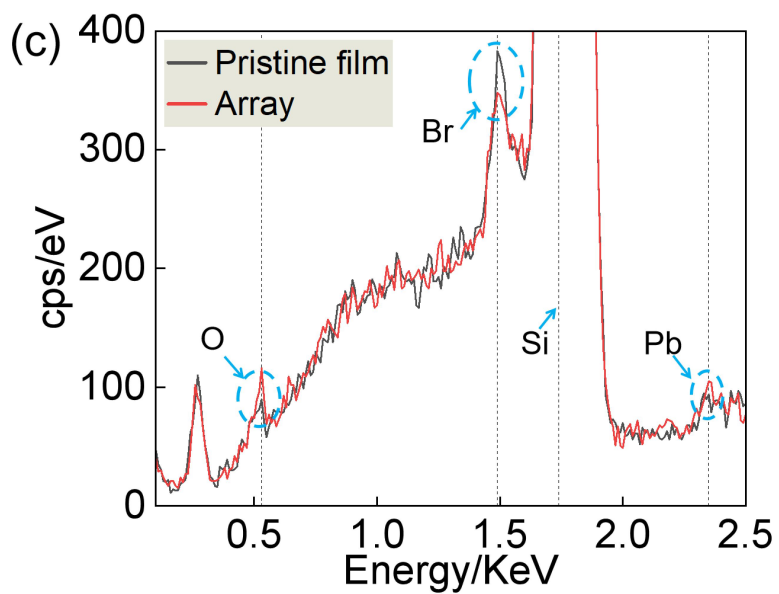

Supplement: d4nr02424a2.pdf [file d4nr02424a2.pdf]

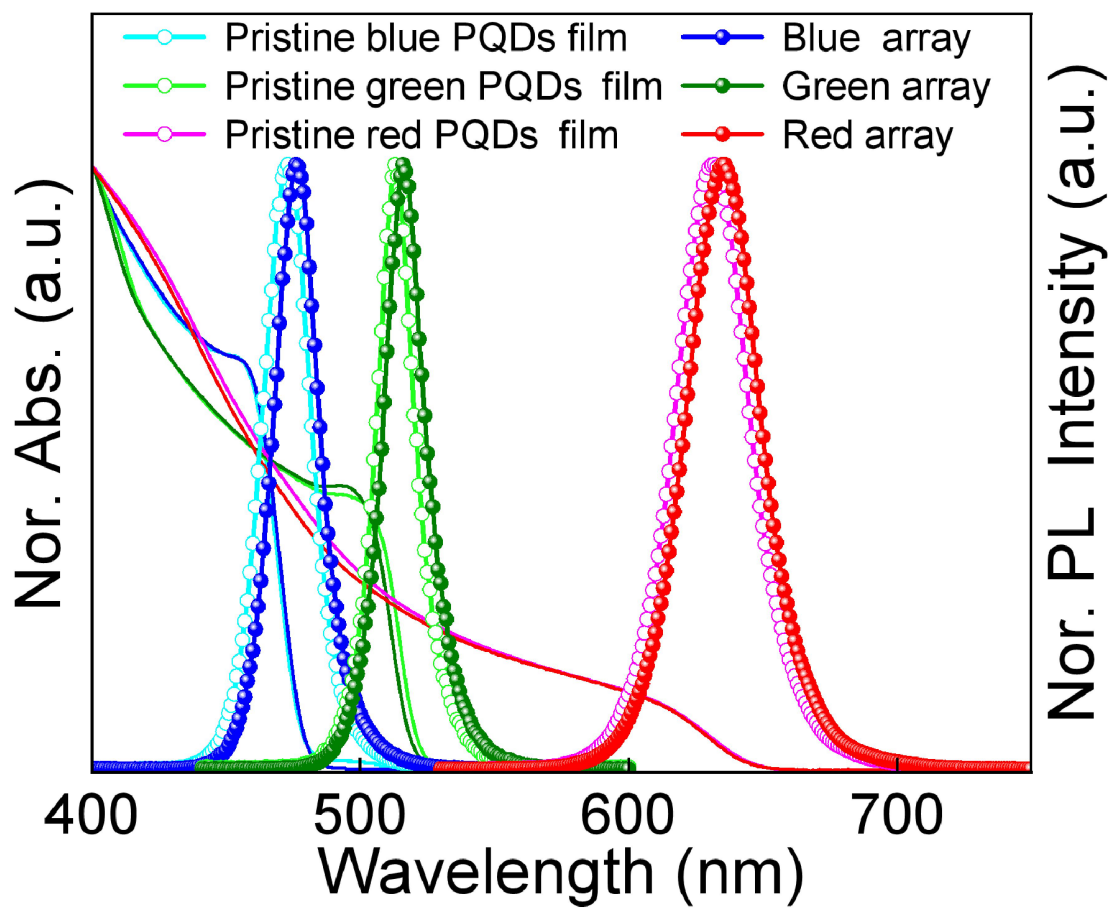

Supplement: d4nr02424a3.pdf [file d4nr02424a3.pdf]

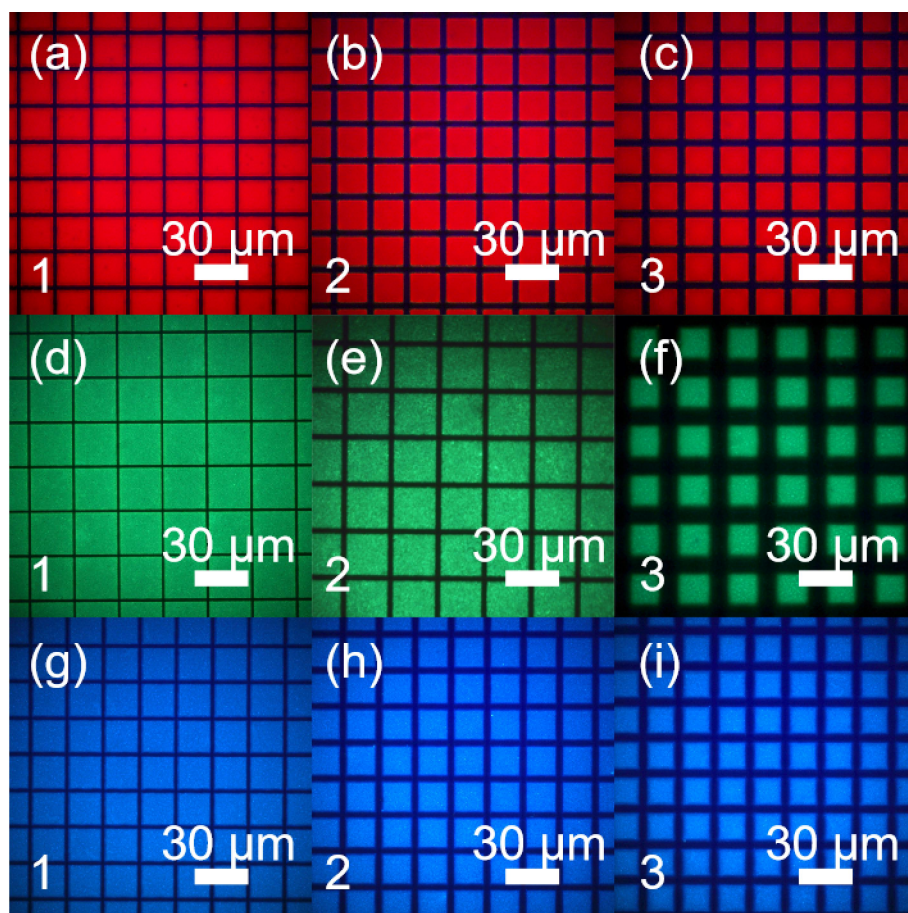

Supplement: d4nr02424a4.pdf [file d4nr02424a4.pdf]

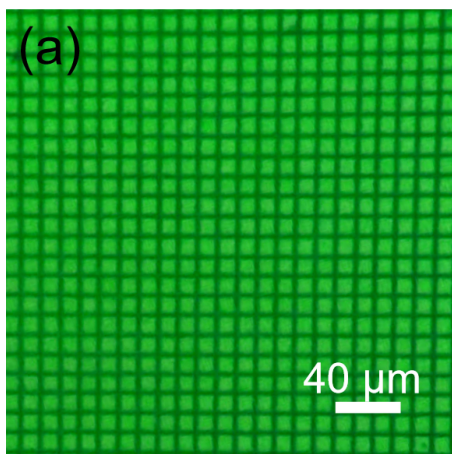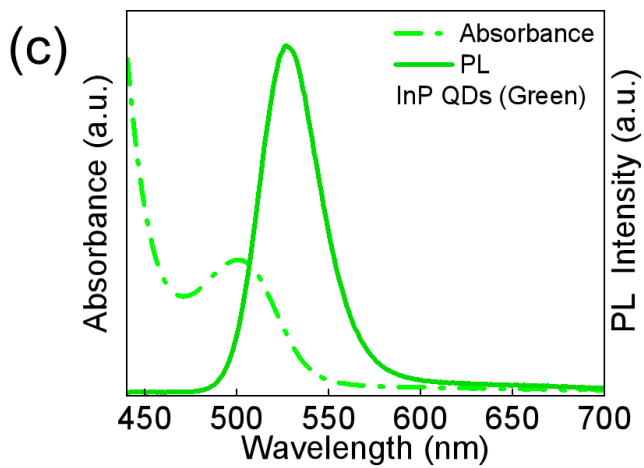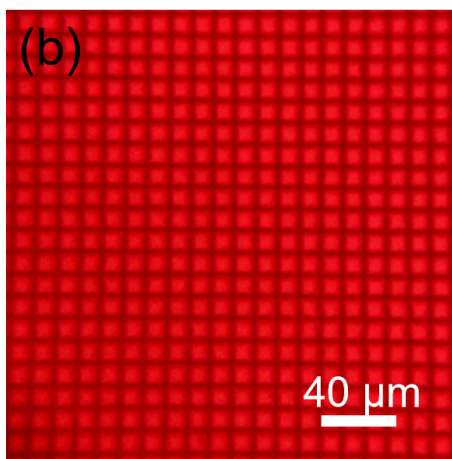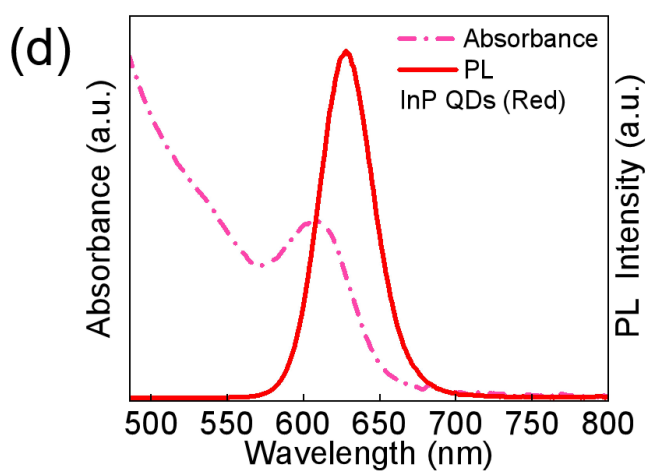

Supplement: d4nr02424a5.pdf [file d4nr02424a5.pdf]

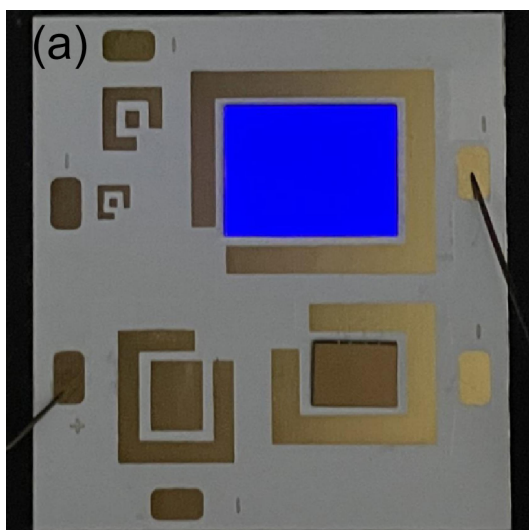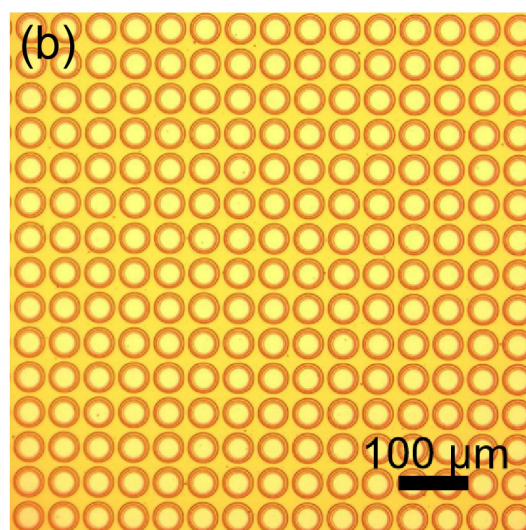

Supplement: d4nr02424a6.pdf [file d4nr02424a6.pdf]

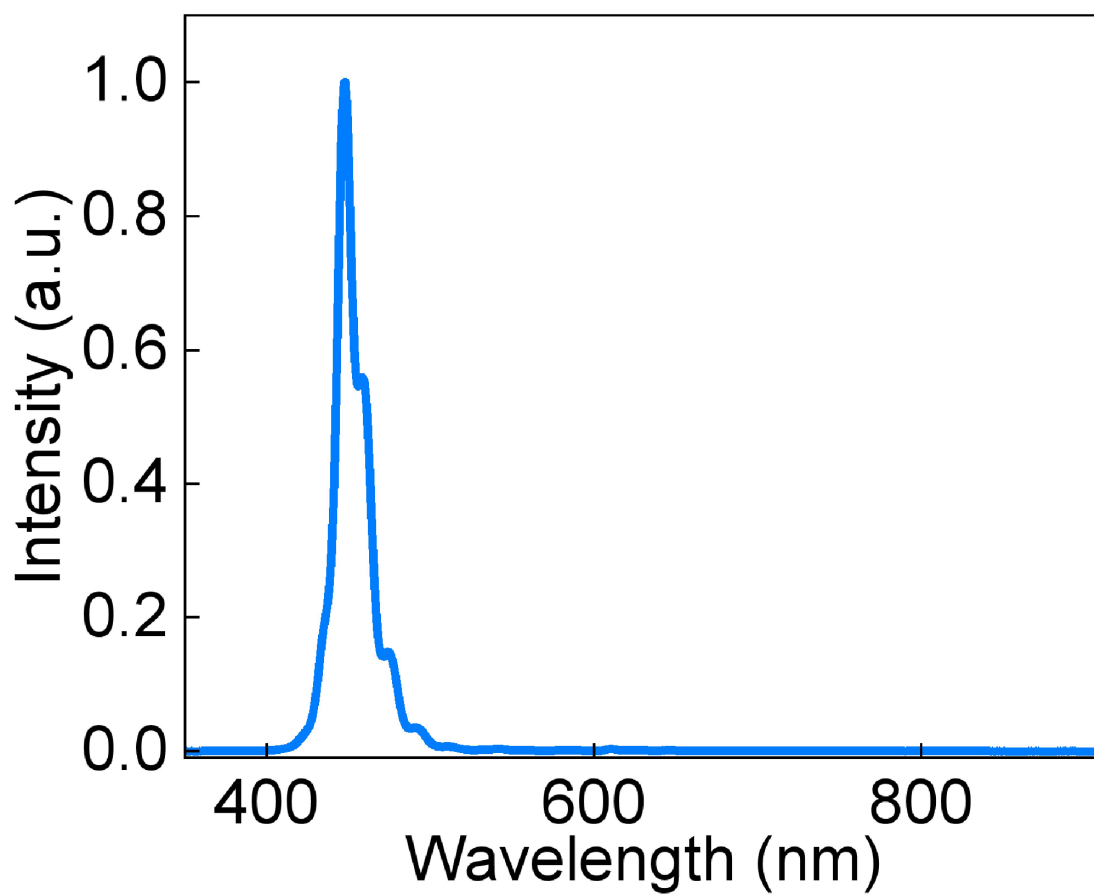

Supplement: d4nr02424a7.pdf [file d4nr02424a7.pdf]

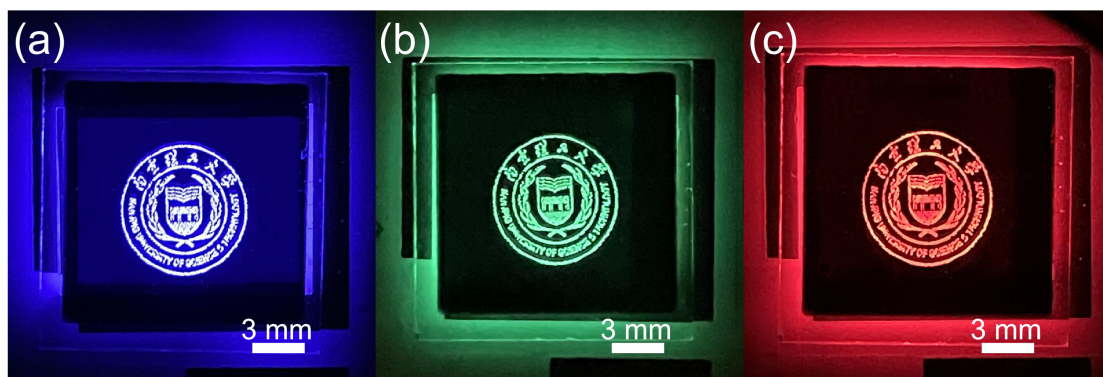

Supplement: d4nr02424a8.pdf [file d4nr02424a8.pdf]

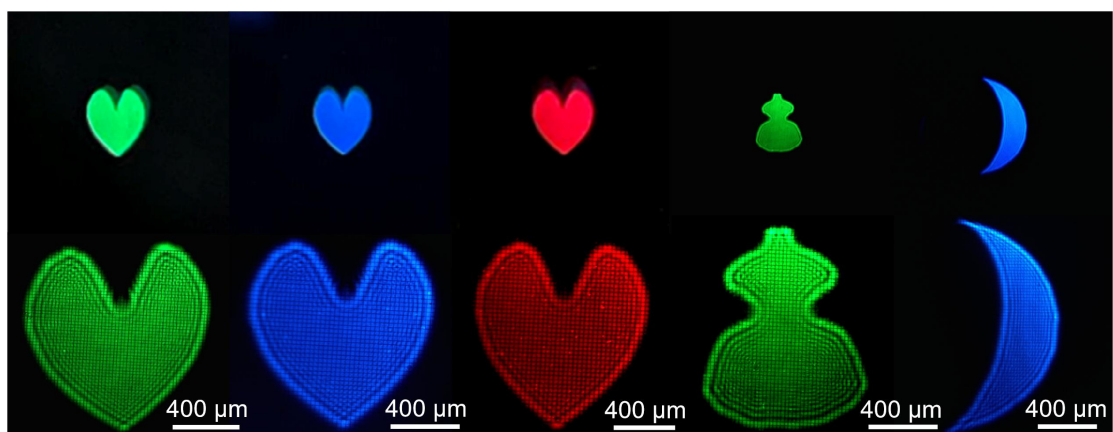

Supplement: d4nr02424a9.pdf [file d4nr02424a9.pdf]
